# Supplementary material for: Dry season drinking from terrestrial man-made watering holes in arboreal wild Temminck's red colobus, The Gambia
Source: Copernicus journal article supplement (doi:10.5194/pb-2-21-2015), 2015-06-12
Supplement: Supplementary file 1 [file Supplementary material_Hillyer et al..docx]

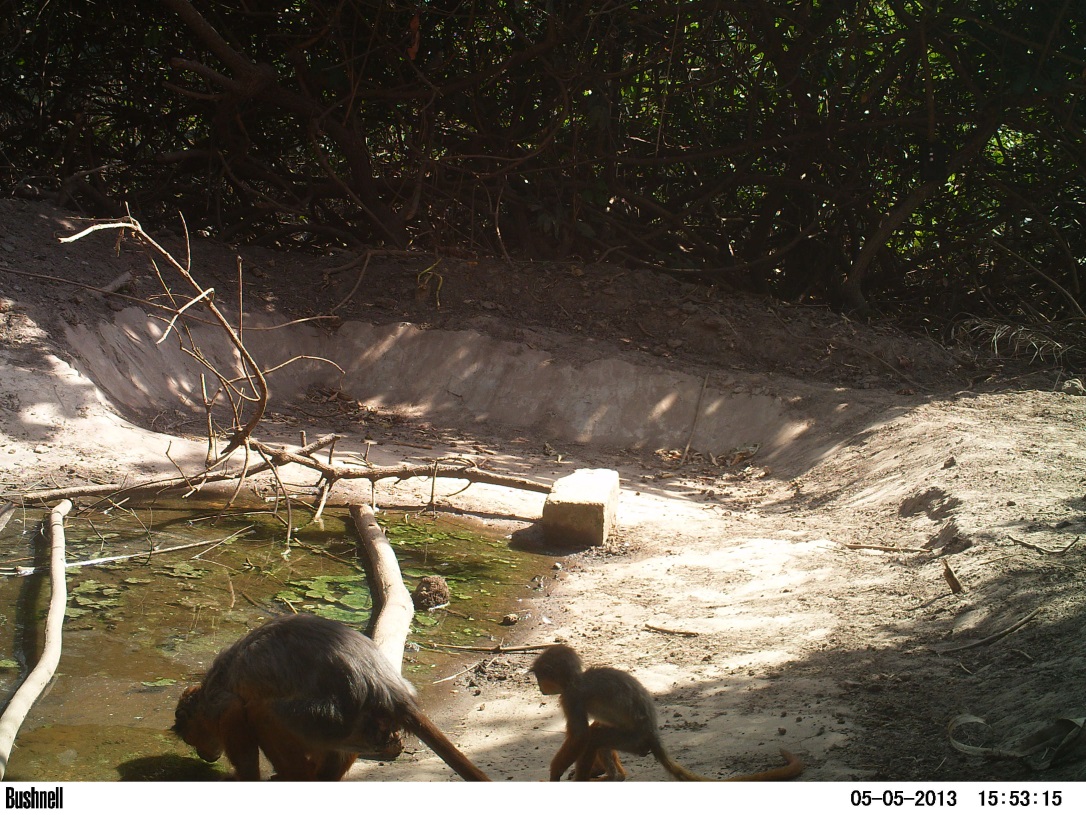


**Figure 2.** Adult female with infant at man-made water hole, ANR.

**
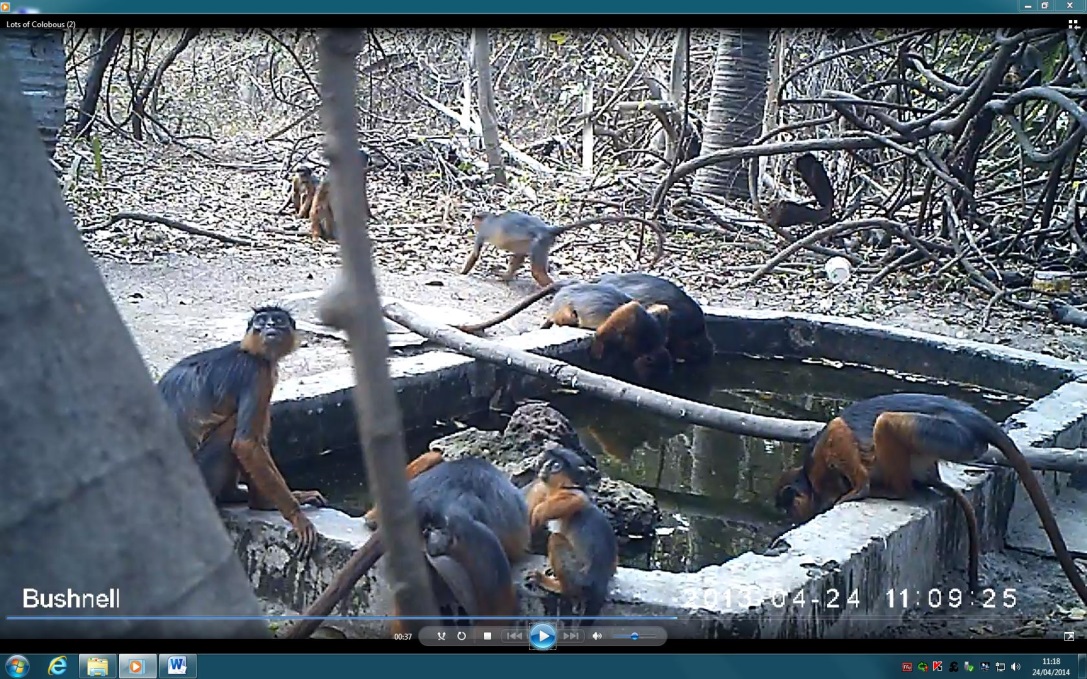
**

**Figure 3.** Colobus group at man-made water hole, BFP.


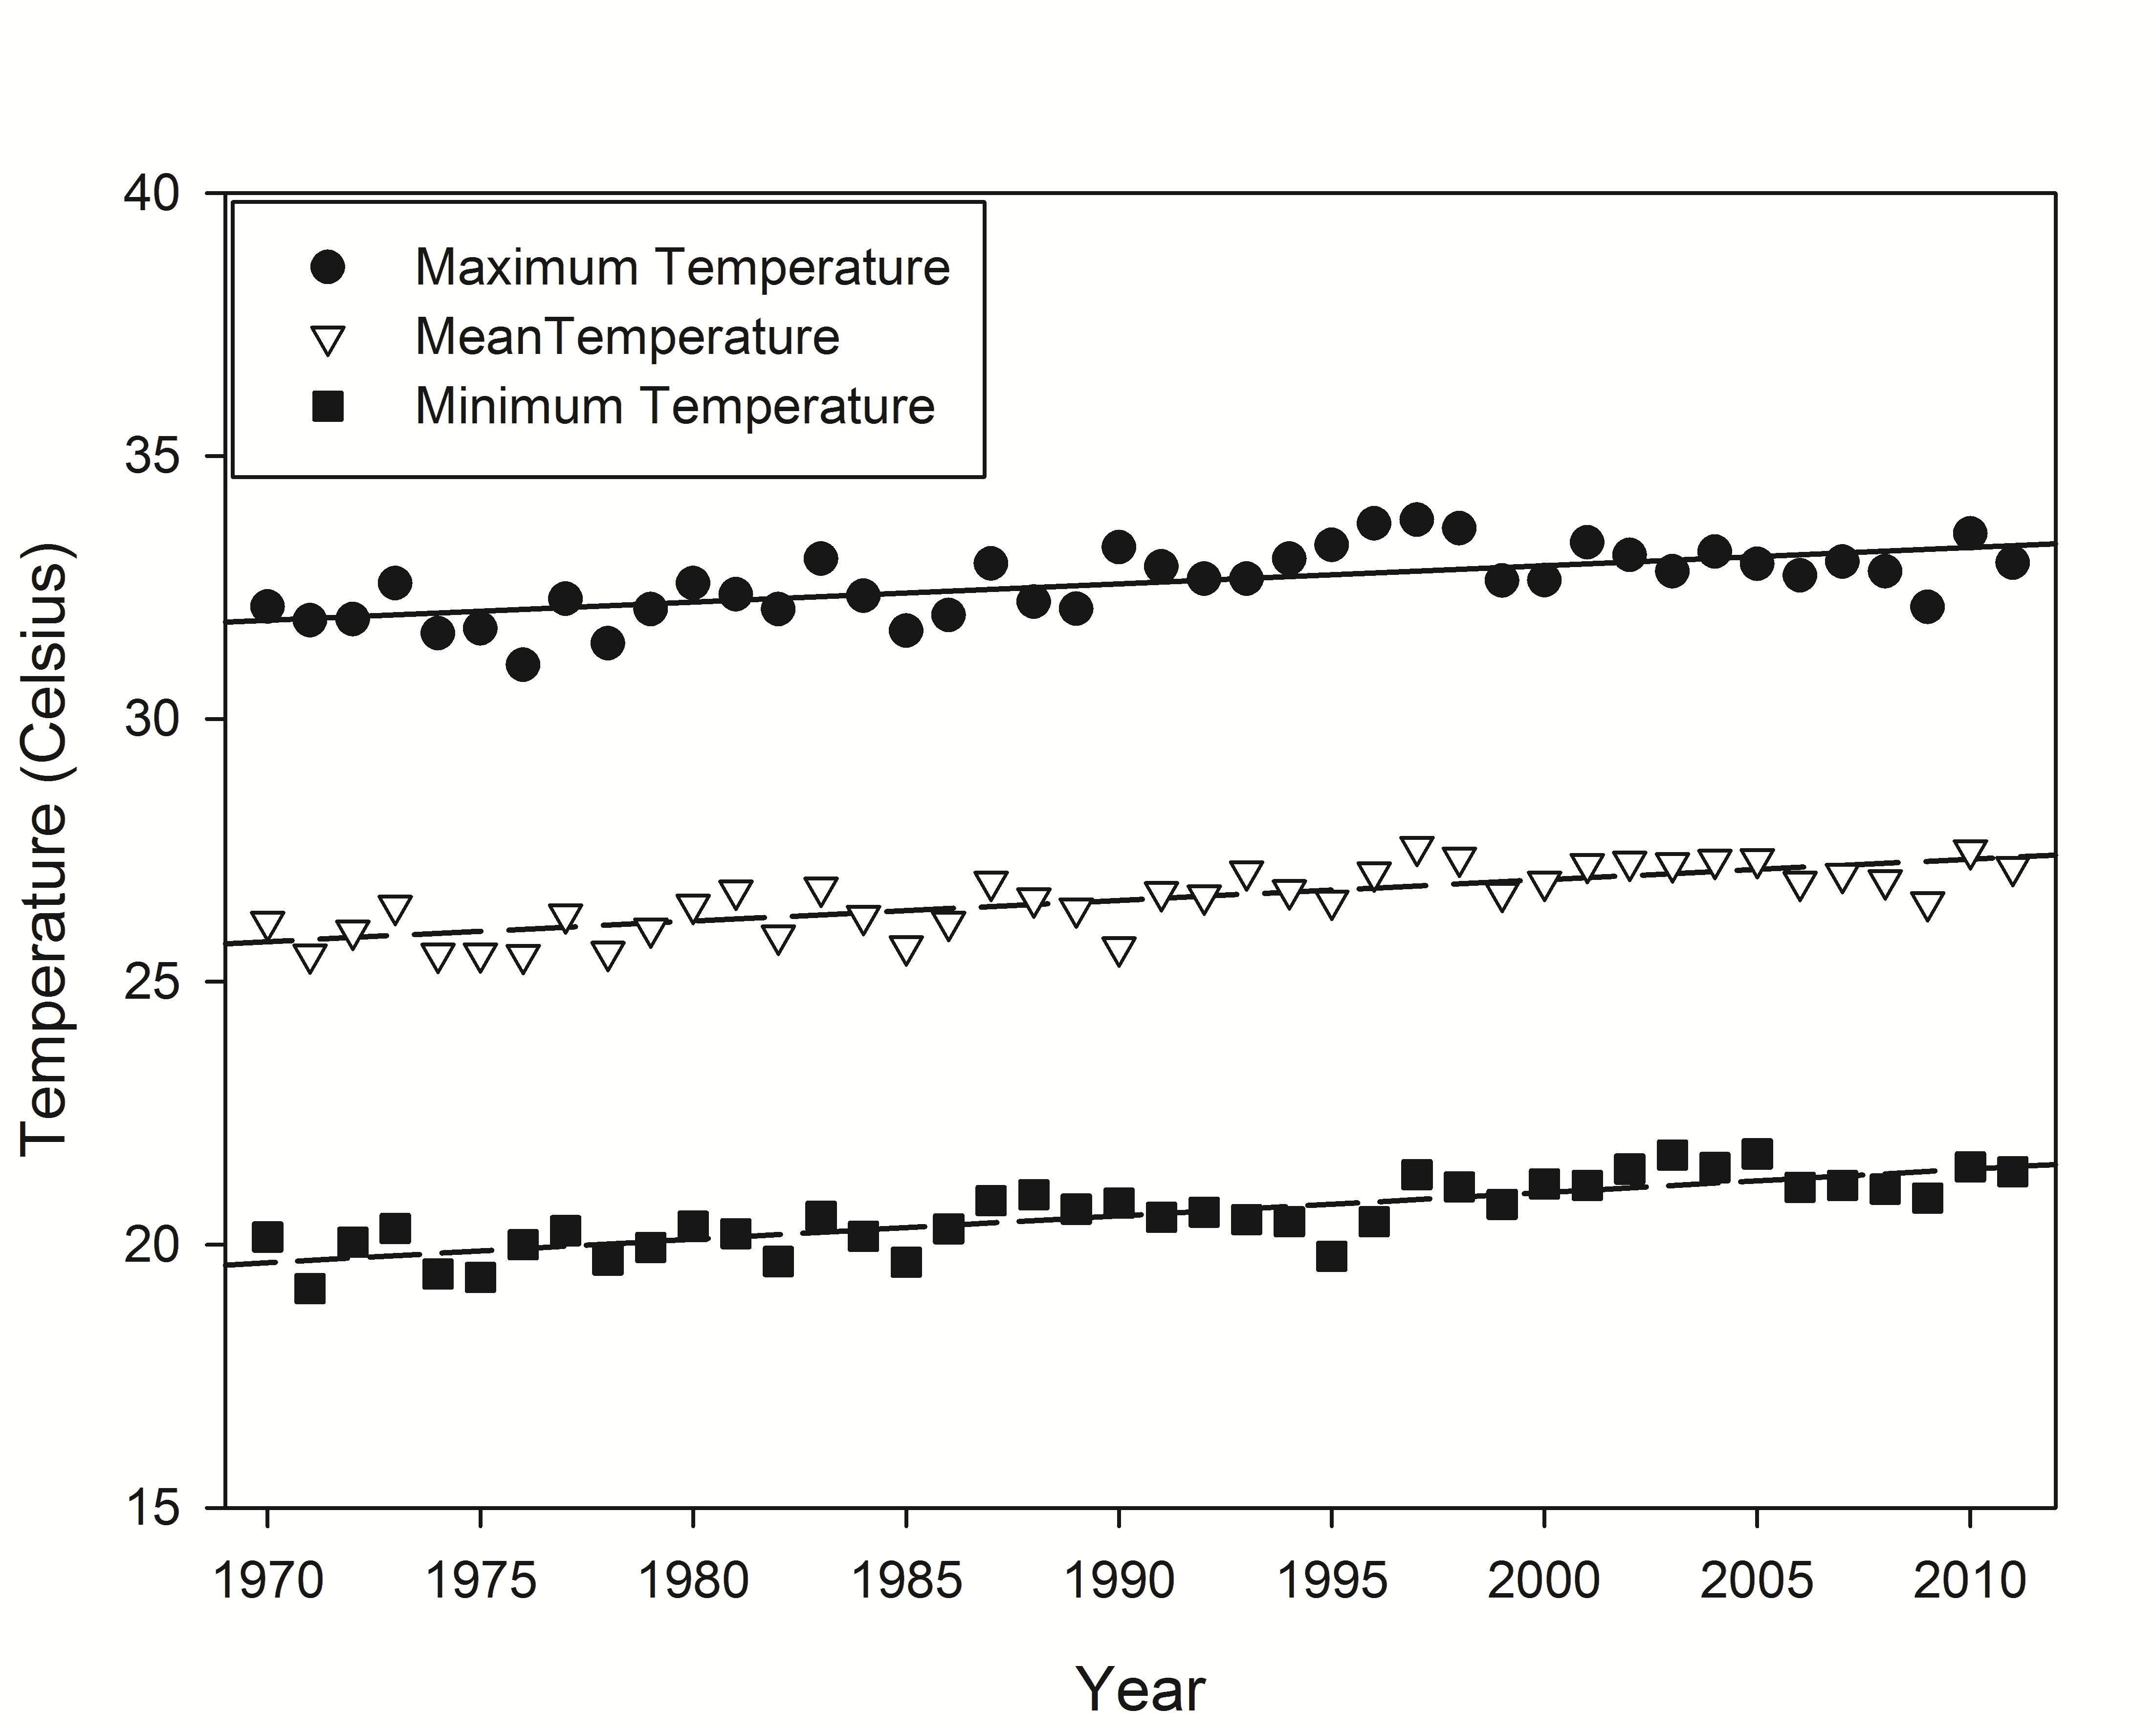


**Figure 4.** Average values of the: maximum (●), mean (Δ) and minimum temperatures (■) from 1970 -2011.
