# Supplementary material for: Dry season drinking from terrestrial man-made watering holes in arboreal wild Temminck's red colobus, The Gambia
Source: Copernicus journal article supplement (doi:10.5194/pb-2-21-2015), 2015-06-12
Supplement: Supplementary file 2 [file pb-2-21-2015-supplement.zip]

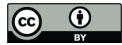

*Supplement of*

**Dry season drinking from terrestrial man-made watering holes in arboreal wild Temminck's red colobus, The Gambia**

**A. P. Hillyer et al.**

*Correspondence to:* A. P. Hillyer ([alisonhillyer@yahoo.co.uk](mailto:alisonhillyer@yahoo.co.uk))

- [pb-2-21-2015-supplement-cover-letter.pdf](#)
- [Fig4\\_Hillyer\\_TIF.tif](#)
- [Hillyer\\_Fig4Supplement.pdf](#)
- [Supplementary material\\_Hillyer et al..docx](#)

The copyright of individual parts of the supplement might differ from the CC-BY 3.0 licence.
