# Supplementary figures and images for: Dry season drinking from terrestrial man-made watering holes in arboreal wild Temminck's red colobus, The Gambia
Source: Copernicus journal article supplement (doi:10.5194/pb-2-21-2015), 2015-06-12

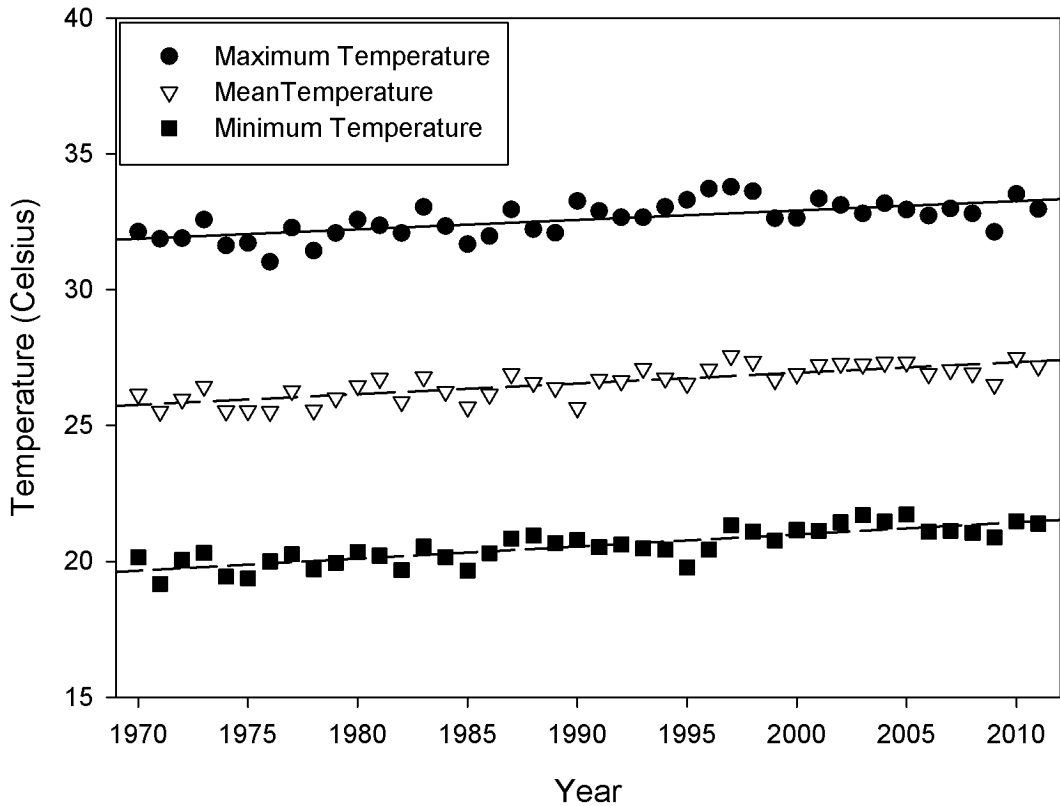

Supplement: Supplementary file 1 [file pb-2-21-2015-supplement.zip]
